# Supplementary material for: Antimicrobials Used in Backyard and Commercial Poultry and Swine Farms in the Philippines: A Qualitative Pilot Study
Source: PubMed Central journal article supplement (PMC7360799; doi:10.3389/fvets.2020.00329), 2020-07-08
Supplement: Data_Sheet_2.pdf [file Data_Sheet_2.pdf]

## SUPPLEMENTARY MATERIALS – PART II

**ANNEX 1** | Reported reasons for antimicrobial use by systemic syndromes/diseases in poultry and swine commercial and backyard farms in the Philippines

### A. Poultry (n = 39 farms).

| Antimicrobial class/active ingredient | Enteric<br>n (%) | Respiratory<br>n (%) <sup>1</sup> |
|---------------------------------------|------------------|-----------------------------------|
| <b>Aminoglycosides</b>                |                  |                                   |
| Streptomycin                          | -                | 2 (5%)                            |
| <b>Fluoroquinolones</b>               |                  |                                   |
| Enrofloxacin                          | -                | 13 (33%)                          |
| Levofloxacin                          | -                | 1 (3%)                            |
| Norfloxacin                           | -                | 10 (26%)                          |
| <b>Macrolides</b>                     |                  |                                   |
| Erythromycin                          | -                | 3 (8%)                            |
| Kitasamycin                           | -                | 1 (3%)                            |
| Tilmicosin                            | -                | 2 (5%)                            |
| Tylosin                               | -                | 3 (8%)                            |
| <b>Penicillin</b>                     |                  |                                   |
| Amoxicillin                           | 2 (5%)           | 8 (20%)                           |
| Penicillin                            | -                | 1 (3%)                            |
| <b>Phenicol</b>                       |                  |                                   |
| Florfenicol                           | -                | 4 (10%)                           |
| Thiamphenicol                         | -                | 1 (3%)                            |
| <b>Phosphonic acid derivatives</b>    |                  |                                   |
| Fosfomycin                            | -                | 4 (10%)                           |
| <b>Polypeptides</b>                   |                  |                                   |
| Colistin                              | 2 (5%)           | 3 (8%)                            |
| <b>Tetracyclines</b>                  |                  |                                   |
| Doxycycline                           | 1 (3%)           | 5 (13%)                           |
| Oxytetracycline                       | -                | 4 (10%)                           |
| <b>Trimethoprim and sulfonamides</b>  |                  |                                   |
| Trimethoprim-sulfadiazine             | 1 (3%)           | 4 (10%)                           |
| Trimethoprim-sulfamethoxazole         | 2 (5%)           | -                                 |

<sup>1</sup> Percentage is the number of farms using the antimicrobial divided by the total number of poultry farms; please note that responses were not mutually exclusive where one farm may have used the same antimicrobial for the treatment of both enteric and respiratory diseases.

- no response for the antimicrobial and reason for use.

**B. Swine (n = 54 farms).**

| <b>Antimicrobial class/active ingredient</b> | <b>Enteric n (%)<sup>1</sup></b> | <b>Reproductive n (%)</b> | <b>Respiratory n (%)</b> | <b>Nonspecific n (%)</b> |
|----------------------------------------------|----------------------------------|---------------------------|--------------------------|--------------------------|
| Aminoglycosides                              |                                  |                           |                          |                          |
| Apramycin                                    | 1 (2%)                           | -                         | -                        | -                        |
| Gentamicin                                   | 1 (2%)                           | 3 (6%)                    | 3 (6%)                   | -                        |
| Neomycin                                     | 1 (2%)                           | -                         | -                        | -                        |
| Streptomycin                                 | 1 (2%)                           | -                         | 1 (2%)                   | -                        |
| Cephalosporins                               |                                  |                           |                          |                          |
| Ceftiofur                                    | -                                | -                         | 2 (4%)                   | -                        |
| Cephalexin                                   | 1 (2%)                           | -                         | -                        | -                        |
| Fluoroquinolones                             |                                  |                           |                          |                          |
| Ciprofloxacin                                | 1 (2%)                           | -                         | -                        | -                        |
| Danofloxacin                                 | -                                | -                         | -                        | 1 (2%)                   |
| Enofloxacin                                  | 9 (17%)                          | -                         | 11 (21%)                 | 1 (2%)                   |
| Norfloxacin                                  | -                                | -                         | 3 (6%)                   | -                        |
| Lincosamides                                 |                                  |                           |                          |                          |
| Lincomycin                                   | 1 (2%)                           | -                         | 2 (4%)                   | -                        |
| Lincomycin-spectinomycin                     | 1 (2%)                           | -                         | 1 (2%)                   | -                        |
| Macrolides                                   |                                  |                           |                          |                          |
| Tilmicosin                                   | -                                | -                         | 4 (8%)                   | -                        |
| Tulathromycin                                | -                                | -                         | 1 (2%)                   | -                        |
| Tylosin                                      | 5 (9%)                           | -                         | 7 (13%)                  | -                        |
| Penicillin                                   |                                  |                           |                          |                          |
| Amoxicillin                                  | 1 (2%)                           | 1 (2%)                    | 8 (15%)                  | 1 (2%)                   |
| Penicillin                                   | -                                | -                         | 1 (2%)                   | -                        |
| Phenicols                                    |                                  |                           |                          |                          |
| Florfenicol                                  | 1 (2%)                           | -                         | 6 (11%)                  | -                        |
| Pleuromutilins                               |                                  |                           |                          |                          |
| Tiamulin                                     | 4 (8%)                           | -                         | 8 (15%)                  | -                        |
| Polypeptides                                 |                                  |                           |                          |                          |
| Colistin                                     | 2 (4%)                           | -                         | 4 (8%)                   | -                        |
| Tetracycline                                 |                                  |                           |                          |                          |
| Chlortetracycline                            | 2 (4%)                           | -                         | 1 (2%)                   | -                        |
| Doxycycline                                  | 2 (4%)                           | 1 (2%)                    | 7 (13%)                  | 1 (2%)                   |
| Oxytetracycline                              | 7 (13%)                          | 4 (8%)                    | 8 (15%)                  | 2 (4%)                   |
| Trimethoprim and sulfonamides                |                                  |                           |                          |                          |
| Trimethoprim-sulfadiazine                    | -                                | -                         | 2 (4%)                   | -                        |

<sup>1</sup> Percentage is the number of farms divided by the total number of swine farms; please note that responses were not mutually exclusive where one farm may have used the same antimicrobial for various reasons.

- no response for the antimicrobial and reason for use.

ANNEX 2 | Reported routes of administration of the antimicrobials used on farm

**A. Routes of administration in poultry (n=39 farms).**

| Antimicrobial class/active ingredient | Feed n (%) <sup>1</sup> | Intramuscular n (%) | Water n (%) | Both water and intramuscular n (%) <sup>2</sup> |
|---------------------------------------|-------------------------|---------------------|-------------|-------------------------------------------------|
| <b>Aminoglycosides</b>                |                         |                     |             |                                                 |
| Streptomycin                          | -                       | -                   | 2 (5%)      | -                                               |
| <b>Fluoroquinolones</b>               |                         |                     |             |                                                 |
| Enrofloxacin                          | -                       | -                   | 13 (33%)    | 1 (3%)                                          |
| Levofloxacin                          | -                       | -                   | 1 (3%)      | -                                               |
| Norfloxacin                           | -                       | -                   | 9 (23%)     | 1 (3%)                                          |
| <b>Phosphonic acid derivatives</b>    |                         |                     |             |                                                 |
| Fosfomycin                            | -                       | -                   | 4 (10%)     | -                                               |
| <b>Macrolides</b>                     |                         |                     |             |                                                 |
| Erythromycin                          | -                       | -                   | 3 (8%)      | -                                               |
| Kitasamycin                           | -                       | -                   | 1 (3%)      | -                                               |
| Tilmicosin                            | -                       | -                   | 2 (5%)      | -                                               |
| Tylosin                               | -                       | -                   | 3 (8%)      | -                                               |
| <b>Penicillins</b>                    |                         |                     |             |                                                 |
| Amoxicillin                           | 1 (3%)                  | -                   | 8 (20%)     | -                                               |
| Penicillin                            | -                       | -                   | 1 (3%)      | -                                               |
| <b>Phenicols</b>                      |                         |                     |             |                                                 |
| Florfenicol                           | -                       | -                   | 4 (10%)     | -                                               |
| Thiamphenicol                         | -                       | -                   | 1 (3%)      | -                                               |
| <b>Polypeptides</b>                   |                         |                     |             |                                                 |
| Colistin                              | -                       | -                   | 5 (13%)     | -                                               |
| Tetracycline                          | -                       | -                   | -           | -                                               |
| Doxycycline                           | -                       | -                   | 6 (15%)     | -                                               |
| Oxytetracycline                       | -                       | 1 (3%)              | 3 (8%)      | -                                               |
| <b>Trimethoprim and sulfonamides</b>  |                         |                     |             |                                                 |
| Trimethoprim-sulfadiazine             | -                       | 1 (3)               | 4 (10%)     | -                                               |
| Trimethoprim-sulfamethoxazole         | -                       | -                   | 2 (5%)      | -                                               |

<sup>1</sup> Percentage is the number of responses divided by the total number of poultry farms; please note that responses were not mutually exclusive where one farm may have used the same antimicrobial administered via different routes of administrations.

<sup>2</sup> These antimicrobial active ingredients have pharmaceutical forms intended for both oral and intramuscular administration.

- no response for the antimicrobial and reason for use.

## B. Routes of administration in swine (n=53 farms).

| Antimicrobials class/active ingredient | Feed n (%) | Both feed and intramuscular n (%) | Intramuscular n (%) | Water n (%) |
|----------------------------------------|------------|-----------------------------------|---------------------|-------------|
| <b>Aminoglycosides</b>                 |            |                                   |                     |             |
| Apramycin                              | -          | -                                 | -                   | 1 (2%)      |
| Gentamicin                             | -          | -                                 | 7 (13%)             | -           |
| Neomycin                               | 1 (2%)     | -                                 | -                   | -           |
| Streptomycin                           | -          | -                                 | -                   | 2 (4%)      |
| <b>Cephalosporins</b>                  |            |                                   |                     |             |
| Ceftiofur                              | -          | -                                 | 2 (4%)              | -           |
| Cephalexin                             | -          | -                                 | -                   | 1 (2%)      |
| <b>Fluoroquinolones</b>                |            |                                   |                     |             |
| Ciprofloxacin                          | -          | -                                 | -                   | 1 (2%)      |
| Danofloxacin                           | -          | -                                 | 1 (2%)              | -           |
| Enrofloxacin                           | -          | 1 (2%)                            | 18 (34%)            | 2 (4%)      |
| Norfloxacin                            | -          | -                                 | 2 (4%)              | 1 (2%)      |
| <b>Lincosamides and aminocyclitols</b> |            |                                   |                     |             |
| Lincomycin                             | -          | 1 (2%)                            | 2 (4%)              | -           |
| Lincomycin-spectinomycin               | 1 (2%)     | -                                 | 1 (2%)              | -           |
| <b>Macrolides</b>                      |            |                                   |                     |             |
| Tilmicosin                             | 2 (4%)     | 1 (2%)                            | 1 (2%)              | -           |
| Tulathromycin                          | -          | -                                 | 1 (2%)              | -           |
| Tylosin                                | 1 (2%)     | 1 (2%)                            | 9 (17%)             | 1 (2%)      |
| <b>Penicillin</b>                      |            |                                   |                     |             |
| Amoxicillin                            | -          | 3 (6%)                            | 7 (13%)             | 1 (2%)      |
| Penicillin                             | -          | -                                 | 1 (2%)              | -           |
| <b>Phenicols</b>                       |            |                                   |                     |             |
| Florfenicol                            | -          | 4 (8%)                            | 3 (6%)              | -           |
| <b>Pleuromutilins</b>                  |            |                                   |                     |             |
| Tiamulin                               | 4 (8%)     | 3 (6%)                            | 4 (8%)              | 1 (2%)      |
| <b>Polypeptides</b>                    |            |                                   |                     |             |
| Colistin                               | 1 (2%)     | 1 (2%)                            | -                   | 4 (8%)      |
| <b>Tetracyclines</b>                   |            |                                   |                     |             |
| Chlortetracycline                      | 2 (4%)     | -                                 | 1 (2%)              | -           |
| Doxycycline                            | 2 (4%)     | 3 (6%)                            | 2 (4%)              | 4 (8%)      |
| Oxytetracycline                        | 1 (2%)     | 1 (2%)                            | 19 (36%)            | -           |
| <b>Trimethoprim and sulfonamides</b>   |            |                                   |                     |             |
| Trimethoprim-sulfadiazine              | -          | -                                 | 2 (4%)              | 1 (2%)      |

<sup>1</sup> Percentage is the number of responses divided by the total number of swine farms; please note that responses were not mutually exclusive where one farm may have used the same antimicrobial administered via different routes of administrations.

<sup>2</sup>*These antimicrobial active ingredients have pharmaceutical forms intended for both oral and intramuscular administration.*

*- no response for the antimicrobial and reason for use.*
